# Supplementary material for: Human Tyrosinase: Temperature-Dependent Kinetics of Oxidase Activity
Source: PubMed Central journal article supplement (PMC7037427; doi:10.3390/ijms21030895), 2020-01-30
Supplement: ijms-21-00895-s001.pdf [file ijms-21-00895-s001.pdf]

## Supplementary Materials

**Supplementary Table S1.** Temperature dependent hTyr<sub>tr</sub> activity ( $V_{\text{initial}}$ ) used for the evaluation of the Michaelis-Menten constant.

| [L-DOPA], mM | $V_{\text{initial}}$ , mM/min |                   |                  |                 |
|--------------|-------------------------------|-------------------|------------------|-----------------|
|              | 25°C                          | 31°C              | 37°C             | 43°C            |
| 0.09375      | 0.0036 ± 0.0017               | 0.00180 ± 0.00065 | 0.0024 ± 0.00065 | 0.0062 ± 0.0028 |
| 0.1875       | 0.0073 ± 0.0037               | 0.0030 ± 0.0012   | 0.0060 ± 0.0014  | 0.0096 ± 0.0036 |
| 0.375        | 0.015 ± 0.0082                | 0.015 ± 0.0072    | 0.012 ± 0.0053   | 0.021 ± 0.0097  |
| 0.75         | 0.021 ± 0.012                 | 0.024 ± 0.013     | 0.022 ± 0.011    | 0.034 ± 0.017   |
| 1.5          | 0.024 ± 0.014                 | 0.026 ± 0.014     | 0.029 ± 0.015    | 0.043 ± 0.022   |
| 3.0          | 0.024 ± 0.015                 | 0.024 ± 0.012     | 0.028 ± 0.014    | 0.044 ± 0.021   |
| 6.0          | 0.023 ± 0.013                 | 0.024 ± 0.011     | 0.026 ± 0.012    | 0.041 ± 0.019   |

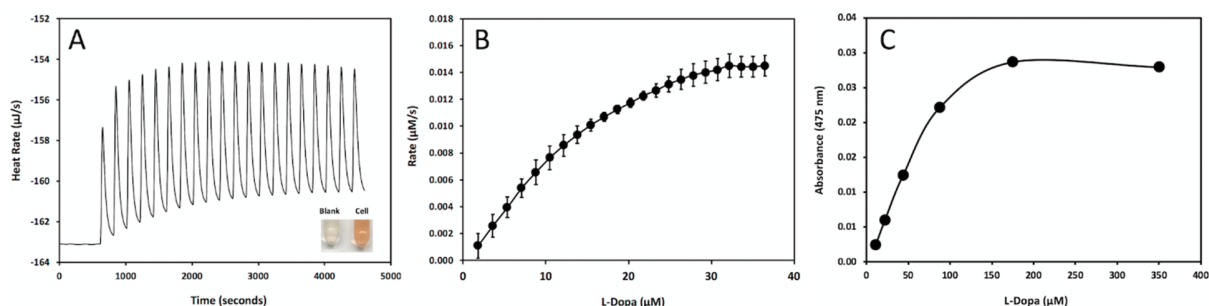

**Figure S1. Isothermal Titration Calorimetry Conversion to Michaelis-Menten.**

**Panel A:** Differences between the sample and reference cell containing deionized water. The heat dilution of L-DOPA into 10 mM sodium phosphate buffer has been subtracted. Insert shows tyrosinase oxidation of L-DOPA compared to buffer blank measured at 37°C. **Panel B:** The data from **Panel A** has been transformed into reaction rate ( $\mu\text{M/s}$ ) and plotted against their corresponding L-DOPA concentrations through TA Nano Analyze Software. **Panel C:** UV spectroscopy derived Michaelis-Menten plot of diphenol-oxidase activity of  $\text{Tyr}_{\text{tr}}$  as a function of L-DOPA concentrations. Assay was measured at 37°C using 475 nm for the formation of dopachrome as a metric for enzyme activity.
